# Supplementary material
Source: Springer Nature journal article supplement (https://www.springermedizin.de/resource/supplementary/12885_2013_5268_MOESM2_ESM.pdf/9465454)

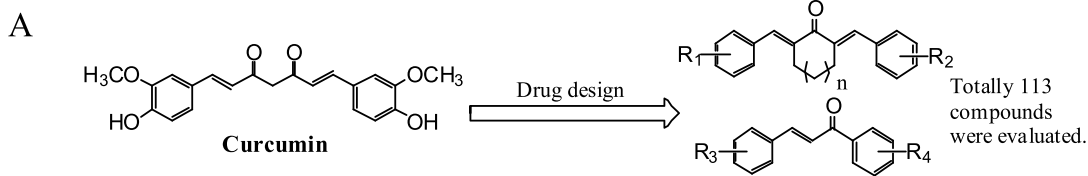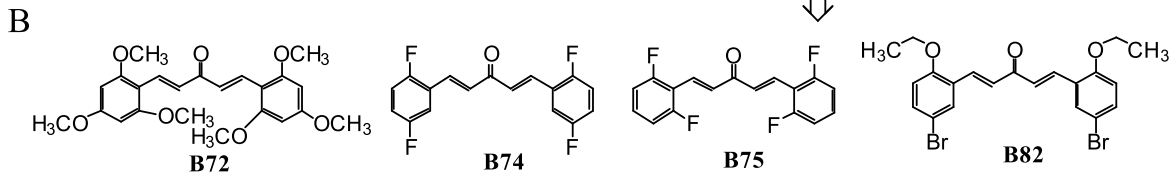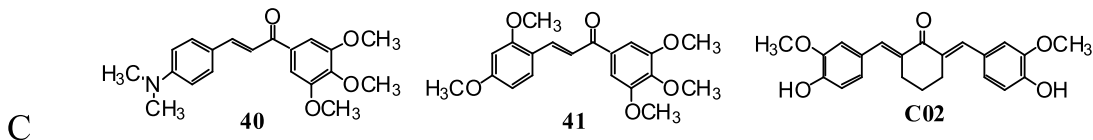

| Cell line | IC <sub>50</sub> (μM) |            |           |           |           |           |           |           |
|-----------|-----------------------|------------|-----------|-----------|-----------|-----------|-----------|-----------|
|           | Curcumin              | B72        | B74       | B75       | B82       | 40        | 41        | C02       |
| H460      | 7.31±2.42             | >50        | 32.3±7.76 | 27.2±4.41 | 2.02±0.32 | 38.2±3.77 | 25.7±10.4 | 16.5±6.20 |
| A549      | 32.7±11.4             | 10.71±1.76 | >50       | 9.00±2.17 | 2.16±1.07 | 3.71±0.66 | 48.3±8.86 | 18.3±5.66 |
| HepG2     | 56.2±14.9             | 3.54±0.99  | >50       | 7.63±1.17 | 5.21±1.65 | 6.19±2.29 | 15.9±3.19 | 4.71±0.77 |
| MCF7      | 8.98±3.21             | 41.27±9.98 | >50       | 21.8±4.38 | 2.21±0.21 | 4.41±0.34 | >50       | 6.07±2.18 |

Supplement: MOESM2 [file 9465454]
